# Supplementary material
Source: PubMed Central journal article supplement (PMC8092718)
Supplement: JCM.02170-20-s0001.pdf [file JCM.02170-20-s0001.pdf]

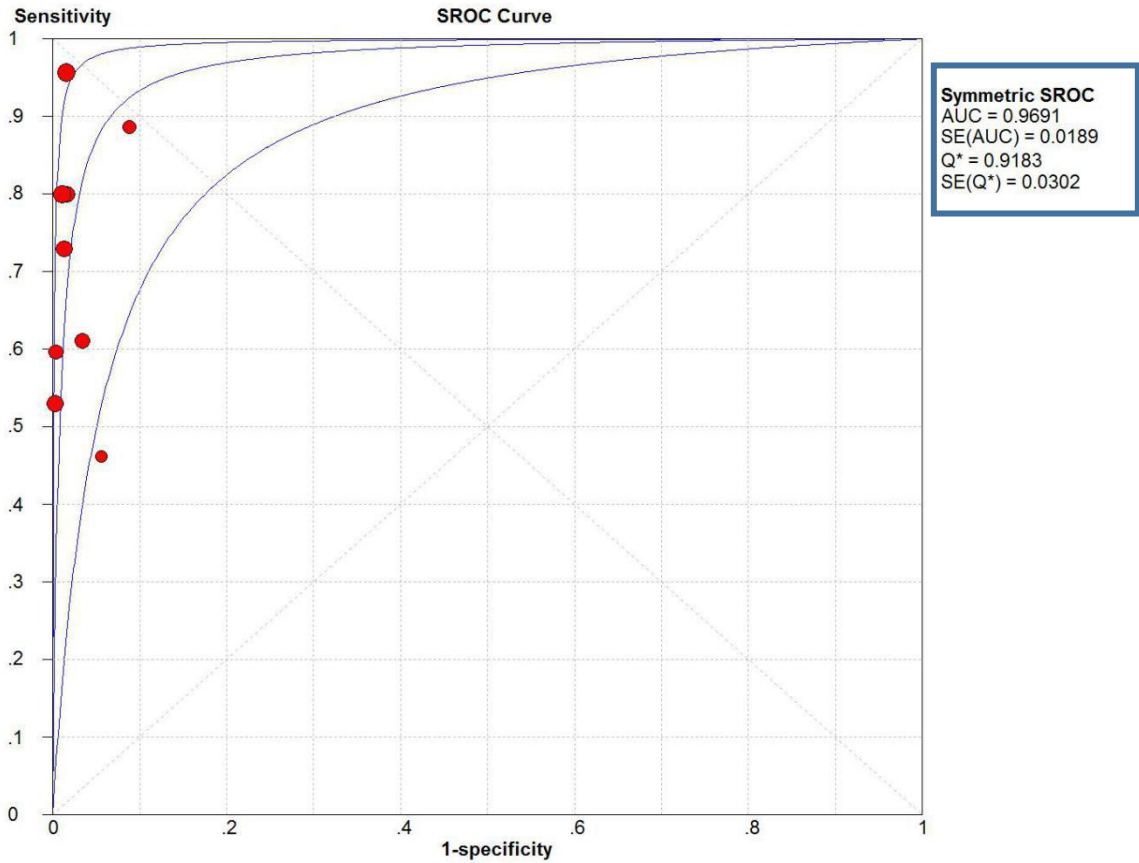

1

2 **Supplementary file 2.** The summary receiver operating characteristic (SROC) curves of  
 3 Xpert MTB/RIF using bronchoalveolar lavage fluid compared to the composite  
 4 reference standard. AUC: area under the curve. SE: standard error.
