# Supplementary material
Source: PubMed Central journal article supplement (PMC8092718)

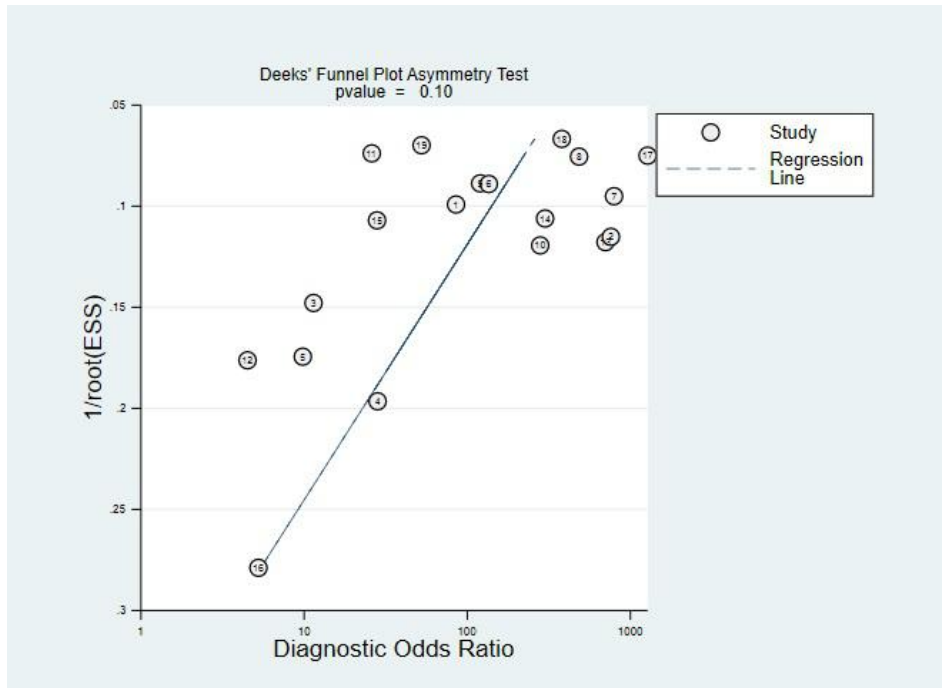

1

2

Supplementary file 3. Deeks' funnel plot of the included studies.

Supplement: JCM.02170-20-s0002.pdf [file JCM.02170-20-s0002.pdf]
